# Supplementary material for: OPERATING CHARACTERISTICS IN A LOW-INDUCTANCE FLASH X-RAY SYSTEM
Source: Royal Society of Chemistry journal article supplement (doi:10.1039/c9ra04706a), 1965-01-01
Supplement: c9ra04706a6.pdf [file c9ra04706a6.pdf]

## Support Information

### **Fabrication of Flexible Transparent Superomniphobic Polydimethylsiloxane Surface with Micropillar Array**

Shengyang Pan, Min Chen and Limin Wu\*

Department of Materials Science and Advanced Coatings Research Center of Ministry of  
Education, Fudan University, Shanghai 200433, China

---

\* Corresponding author.  
E-mail address: [lmw@fudan.edu.cn](mailto:lmw@fudan.edu.cn) (L. Wu)

**Table S1** CAs and CAH of various liquids on PDMS-based surface with different pillar heights

| CA (CAH) of PDMS replicas with different pillar heights (H) / °         | Water           | (CH <sub>2</sub> OH) <sub>2</sub> | Glycerol       | Castor oil     | Peanut oil     | Rapeseed oil   | Olive oil      |
|-------------------------------------------------------------------------|-----------------|-----------------------------------|----------------|----------------|----------------|----------------|----------------|
| H <sub>1</sub> ~ 2 μm: (f) in Fig. S3                                   | 138.3<br>(50)   | 126.4                             | 131.1          | 122.7          | 121.5          | 118.0          | 110.1          |
| H <sub>2</sub> ~ 5 μm: (g) in Fig. S3                                   | 141.5<br>(30)   | 135.3                             | 136.8          | 127.2          | 129.3          | 127.4          | 129.7          |
| H <sub>3</sub> ~ 10 μm: (h) in Fig. S3                                  | 153.8<br>(16.2) | 140.2                             | 148.6          | 134.8          | 138.0          | 139.7          | 133.9          |
| H <sub>4</sub> ~ 20 μm: (i) in Fig. S3 (replica from 5min-plating SiNW) | 162.6<br>(2.6)  | 158.1<br>(4.4)                    | 164.7<br>(3.9) | 164.5<br>(2.1) | 162.7<br>(2.1) | 155.0<br>(6.8) | 158.0<br>(3.1) |
| No obvious pillar: (j) in Fig. S3                                       | 125.9<br>(>50)  | 121.6                             | 126.3          | 113.5          | 115.2          | 104.5          | 101.9          |

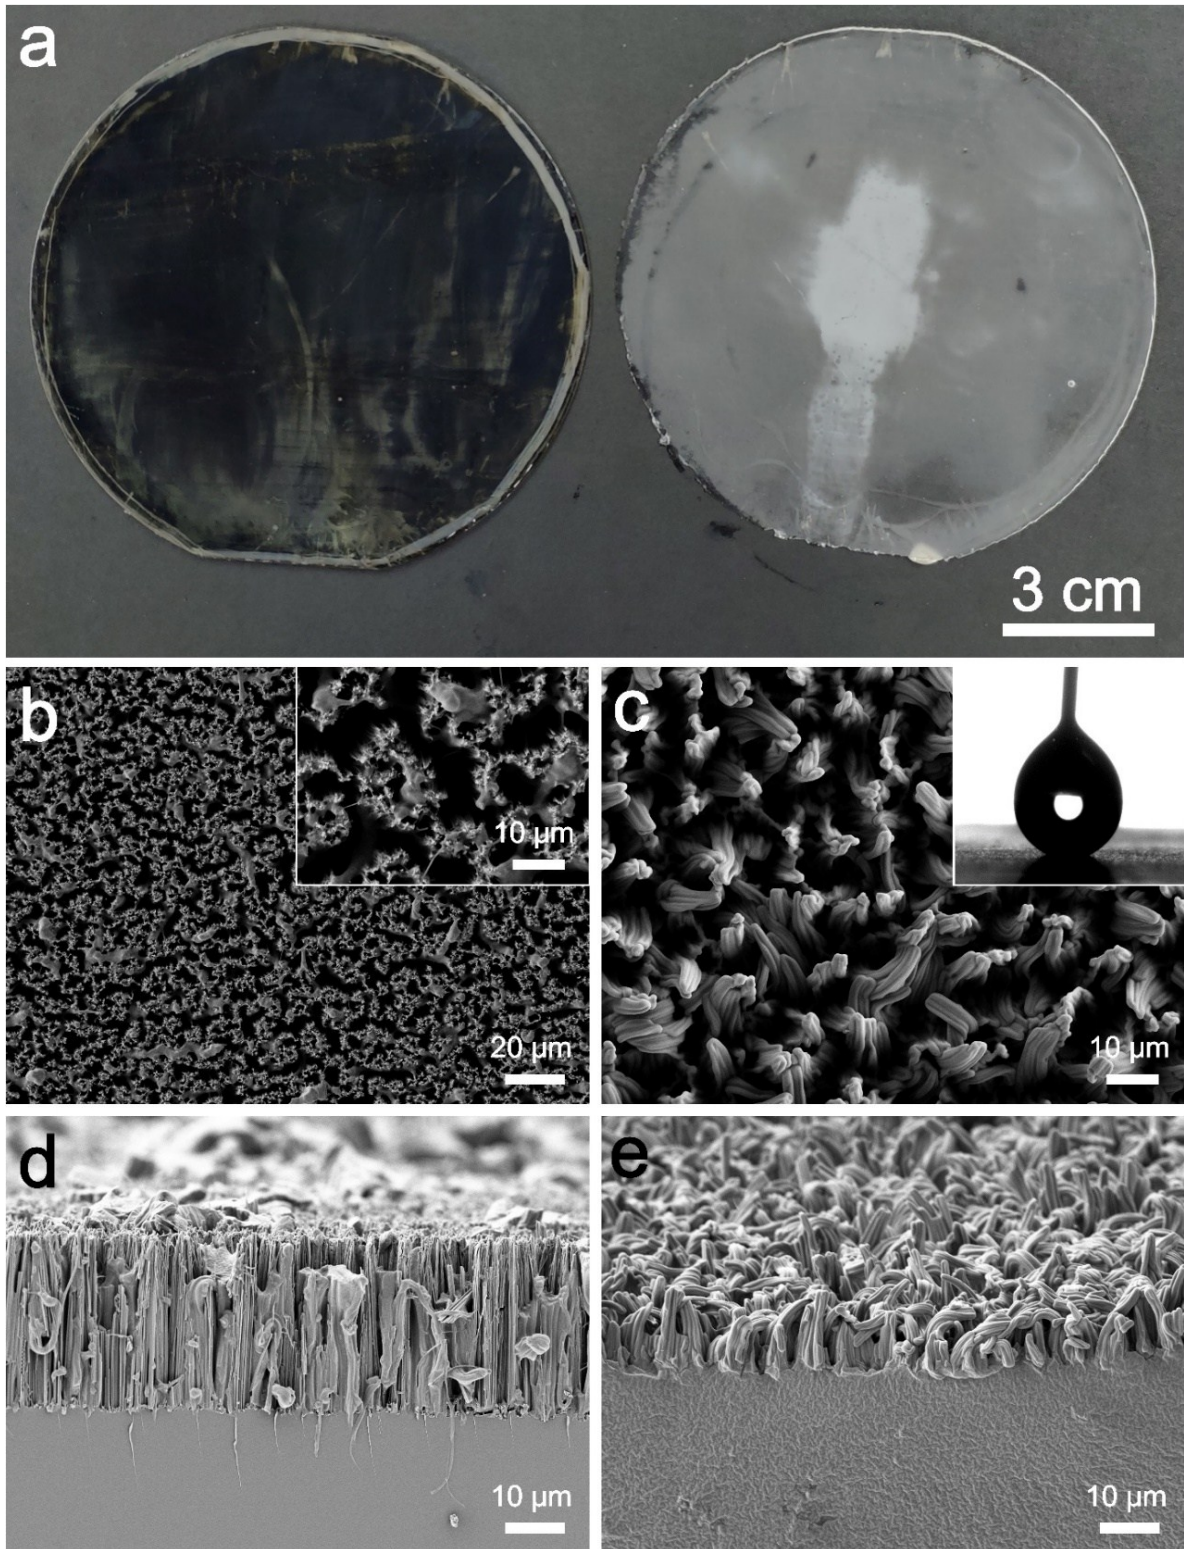

**Fig. S1** (a) Images of reusable SiNW template (left) used for 3<sup>rd</sup> time and the demoulded PDMS surface (right). (b) and (d) FESEM top-view and cross-sectional images of SiNWs after twice moulding process of PDMS. Insets of (b): magnified image of pores and spacings between SiNWs. (c) and (e) FESEM top-view and cross-sectional images of demoulded PDMS micropillar using reusable SiNW template. Insets of (c): olive oil droplet (4  $\mu$ L) sitting on the surface of PDMS micropillar with an OCA of 155.2  $^{\circ}$



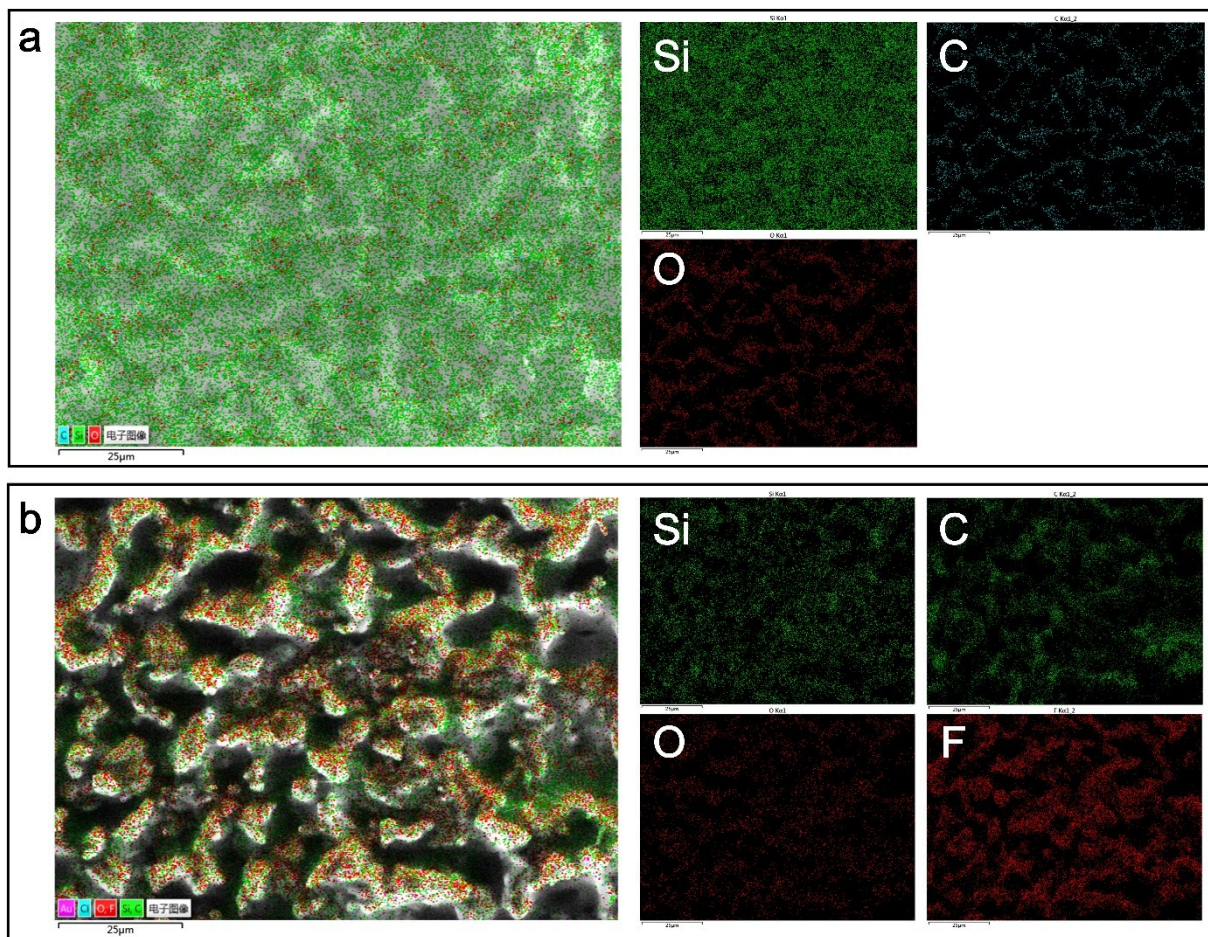

**Fig. S2** EDS mapping of PDMS replica surface before (a) and after (b) surface modification of PFOTS

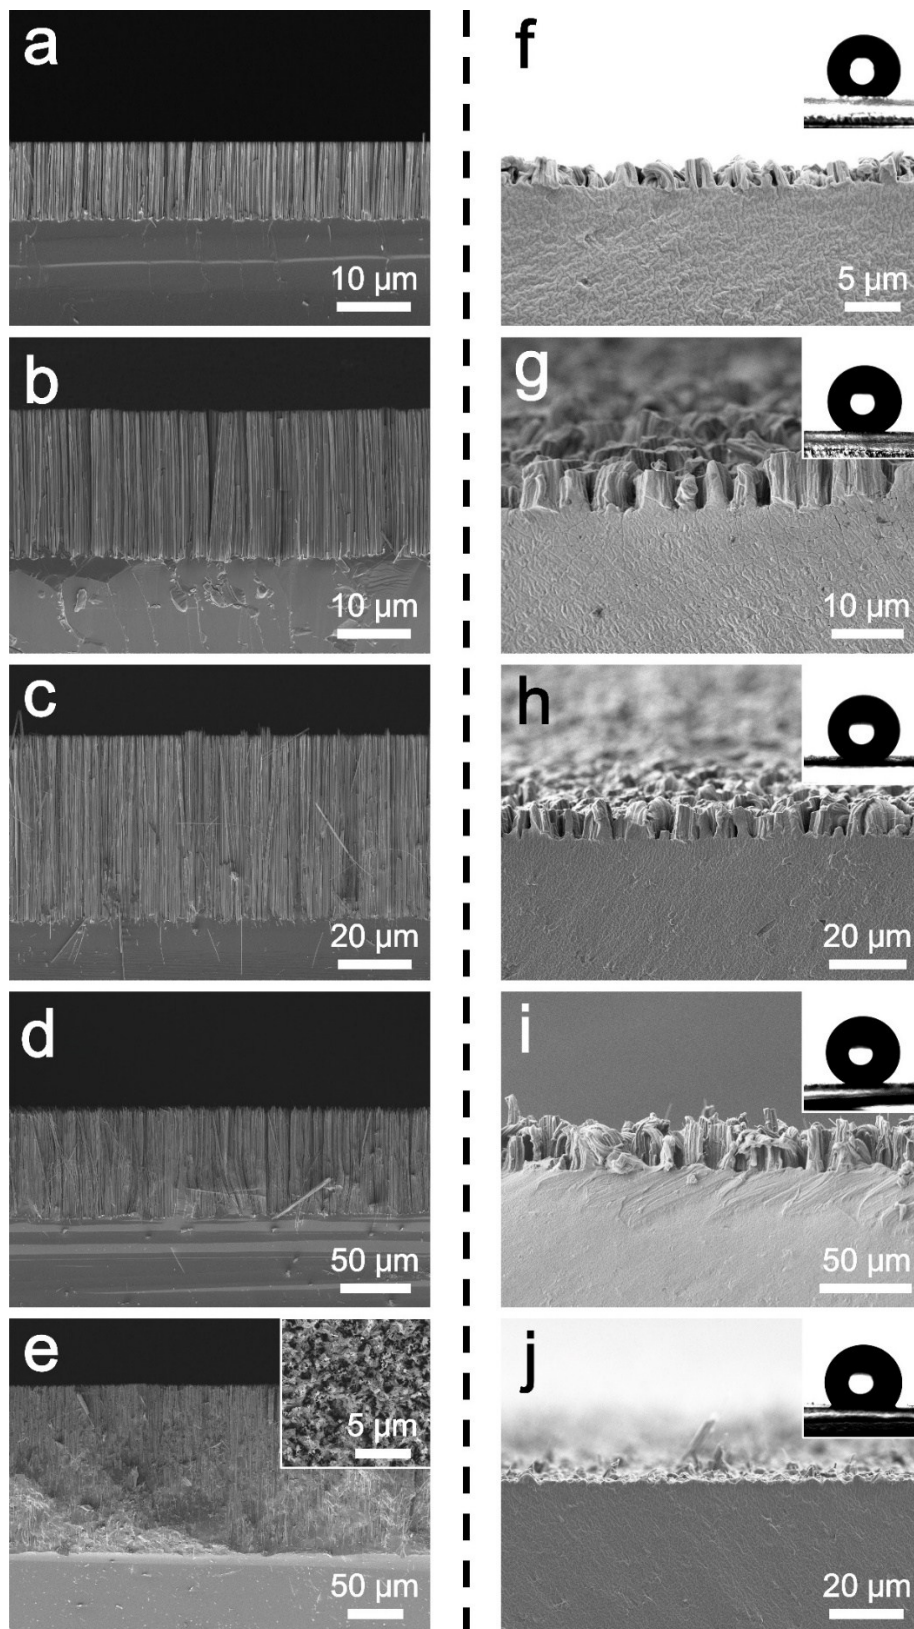

**Fig. S3** (a)-(e) Cross-sectional FESEM images of SiNWs etched with different time: 30 min, 1 h, 3 h, 6 h, 9h, respectively. Insets of (e): surface morphology of Si wafer etched for 9 h. (f)-(j) Cross-sectional FESEM images of PDMS micropillar with different pillar heights after the replication from (a)-(e) respectively. Insets of (f)-(j): water droplet (4  $\mu$ L) sitting on the PDMS surfaces



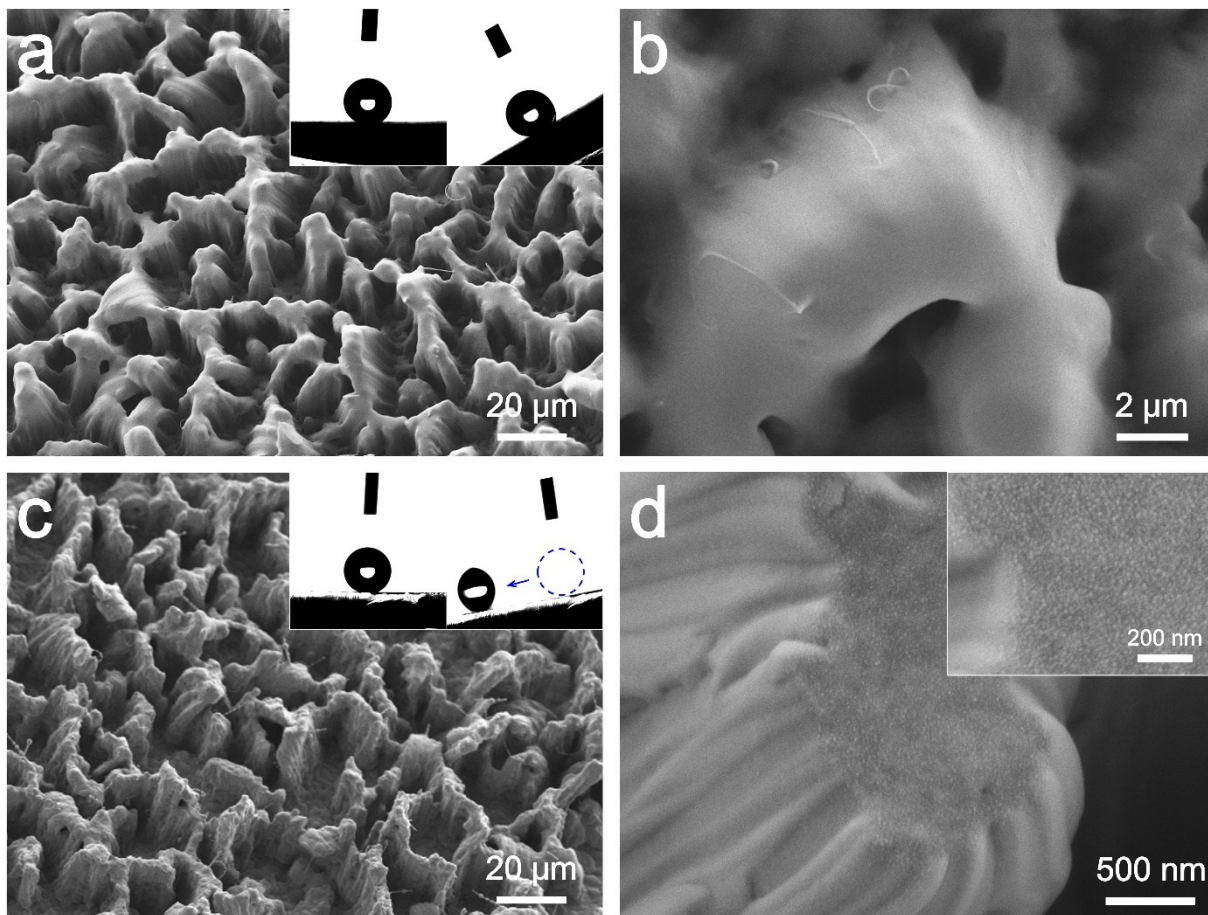

**Fig. S4** (a) and (b) FESEM bird view images of PDMS replica without nanopattern, removed from SiNW template without nanosilica decoration. Insets of (a): water droplet anchored by the surface when tilted to 30 °. (c) and (d) FESEM bird view images of PDMS replica with nanopattern, removed from nanosilica-decorated SiNW template. Insets of (c): water droplet (3  $\mu$ L) slide when surface tilt angle approaching 12 °. Inset of (d): Magnified nanopattern of PDMS replica

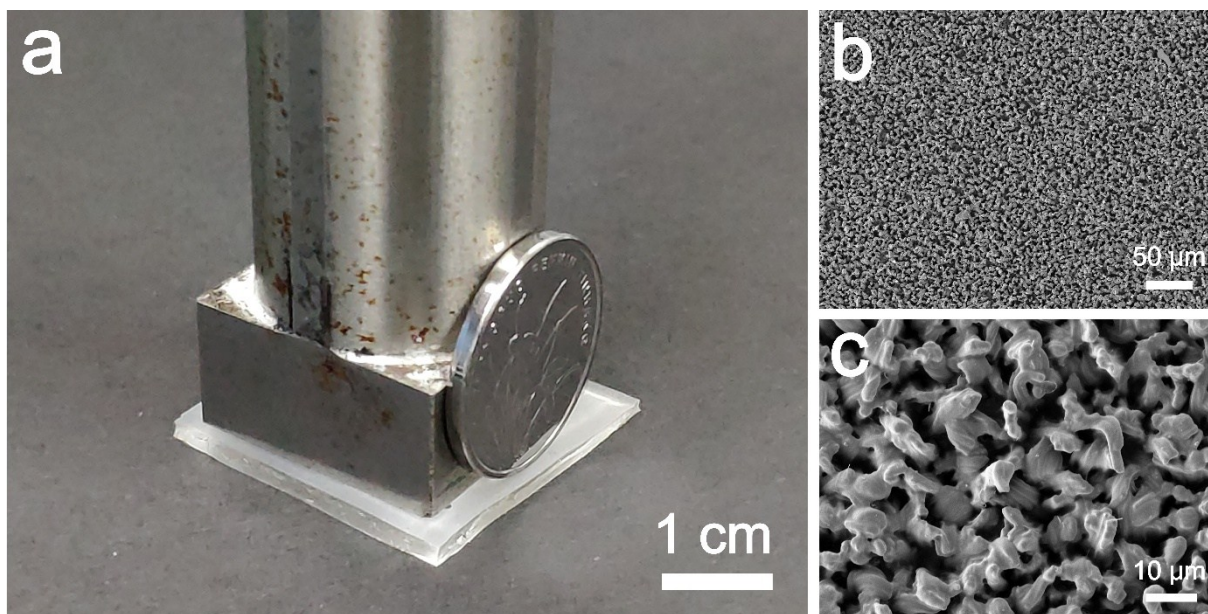

**Fig. S5** (a) Image of a 300 g weight rested on the micropillar array surface. A Chinese coin 1 Jiao was also attached to the weight, for a more localized and greater stress to the surface. (b) and (c) FESEM images of the micropillar morphologies of PDMS surface after compressive test

### Supplementary Videos

**Movie S1** Dynamic video of contact angle hysteresis measurement of various liquids on PDMS-based surface

**Movie S2** Dynamic video of liquid droplet probe test on PDMS-based surface

**Movie S3** Various liquid droplets rolling down the slope surface of PDMS-based film

**Movie S4** Slow motion video of water droplet bounce on PDMS-based surface captured by high-speed camera

**Movie S5** Compressive test of 300 g weight rested to the PDMS-based surface
